# Supplementary material for: Development of a core outcome set for traumatic brachial plexus injury
Source: PubMed Central journal article supplement (PMC11044516; doi:10.1177/17531934231212973), 2023-11-21
Supplement: sj-pdf-1-jhs-10.1177_17531934231212973.pdf [file sj-pdf-1-jhs-10.1177_17531934231212973.pdf]

**Table S1.** Outcomes for voting at consensus meeting.

**General outcomes**

| <b>Outcomes</b>                                | <b>Outcomes</b>                                                                              |
|------------------------------------------------|----------------------------------------------------------------------------------------------|
| Voluntary movement                             | Appropriateness of treatment                                                                 |
| Strength of the arm                            | The ability of the brachial plexus nerves to send signals to the skin and muscles of the arm |
| Carrying and lifting                           | Carrying out daily routine                                                                   |
| Fine hand movement                             | Maintaining personal hygiene                                                                 |
| Ability to feel with the arm                   | Putting on and taking off clothes                                                            |
| Ability to feel to protect the arm from injury | Ability to eat using the utensils/ hands                                                     |
| Pain intensity                                 | Effect on relationship with or ability to care for children                                  |
| Pain duration                                  | Emotional distress                                                                           |
| Pain description                               | Self -confidence                                                                             |
| Overall health                                 | Ability to cope                                                                              |
| Access to treatment                            | Expectations of treatment                                                                    |

## Complication Outcomes

| Outcomes                                                                                | Outcomes                                                                          |
|-----------------------------------------------------------------------------------------|-----------------------------------------------------------------------------------|
| Loss of voluntary movement                                                              | Failure of a surgical join of the nerve                                           |
| Loss of assisted movement (passive)                                                     | Failure of a surgical join of an artery of a vein                                 |
| Limited voluntary movement because of inability to co-ordinate muscles at the same time | Injury to an artery or vein resulting in bleeding where the operation takes place |
| Nerve forms a painful bundle of nerves (neuroma)                                        | Development of a blood clot                                                       |
| Damage to other nerves during the surgery                                               | Breathing problems                                                                |
| Worsening of existing pain or pins and needles                                          |                                                                                   |
