# Supplementary material for: Development of a core outcome set for traumatic brachial plexus injury
Source: PubMed Central journal article supplement (PMC11044516; doi:10.1177/17531934231212973), 2023-11-21
Supplement: sj-pdf-2-jhs-10.1177_17531934231212973.pdf [file sj-pdf-2-jhs-10.1177_17531934231212973.pdf]

**Table S2.** Long list of outcomes with domain categorisation.

| <b>Domain name</b>                              | <b>Outcomes</b>                                                                                                                                                                                                                                                      |
|-------------------------------------------------|----------------------------------------------------------------------------------------------------------------------------------------------------------------------------------------------------------------------------------------------------------------------|
| Physical signs (movement, strength and ability) | Voluntary movement of the arm<br>Passive/ assisted movement of the arm<br>Strength of muscles in the arm<br>The physical appearance of the arm<br>Reaching, pulling, pushing, turning or twisting with the arm<br>Carrying and lifting objects<br>Fine hand movement |
| Sensation and pain in the arm                   | Ability to feel with the arm<br>Ability to feel in order to protect the arm from injury<br>Sensation of heaviness in the arm<br>Pins and needles or tingling in the arm<br>Pain intensity                                                                            |

Pain duration and frequency

Description of the pain

Pain when the arm is exposed to cold

---

Neurophysiology and structure of nervous system

The ability of the brachial plexus nerves to send signals to the skin and muscles in the arm.

The structure of brachial plexus using MRI or other techniques

A measure of the activity in the movement and sensation areas of the brain.

Activities of daily living and work

Carrying out a daily routine

Maintaining personal hygiene

Maintaining personal appearance

Putting on and taking off clothes

Transport needs

Return to full duties at previous role in paid employment

Return to or begin role in education

Return to any other paid/non paid previous role

---

---

Social well-being

Return to previous recreational activities

Effect on relationship with partner/ spouse

Effect on relationship with and or ability to care for, children

Effect on relationship with other family members

Effect on relationships with friends and neighbours

Effects on intimate relationships

Emotional well-being

Emotional distress

Thoughts and beliefs

Intentions and goals

Addictive behaviours (e.g alcohol, medication drugs)

Body Image

Self-esteem and self-confidence

Sleep and overall health

Overall quality of sleep

Overall health

---

---

Delivery of care

Patient satisfaction with health care received

Access to and quality of treatment

Appropriateness of treatment

Costs of care

Out of pocket costs to the patient for outpatient appointments and inpatient care

Costs to the patient from long term loss of individual/ family income

Costs to uninsured private paying patients, insurance or other third party payer (includes national health services) for all outpatient and in-patient care received for a brachial plexus injury including medication

Complications (muscle and bone)

Loss of voluntary (active) movement

Loss of assisted range of motion (stiffness)

Failure of the bone to unite following bone surgery

Bone uniting in the wrong position

---

---

Complications (nerve related)

Damage to other nerves during the surgery

Worsening of existing pain / pins and needles

Development of pain/ pins and needles in a new area of the body

Increased sensitivity of the scar

Complications (problems with surgical joins and infection)

A nerve join results in a formation of bundle of painful nerves

Failure of the surgical join of the nerves

Failure of the surgical join of the artery/ vein

Infection in the body part that was operated on

Problems with wounds such as infection, failure to heal properly

Complications (bleeding and breathing problems)

Injury to an artery or vein resulting in bleeding where the operation takes place

Bleeding from the wound

Development of a blood clot

Breathing problems

Chest infection

---
