# Supplementary material for: Development of a core outcome set for traumatic brachial plexus injury
Source: PubMed Central journal article supplement (PMC11044516; doi:10.1177/17531934231212973), 2023-11-21
Supplement: sj-pdf-3-jhs-10.1177_17531934231212973.pdf [file sj-pdf-3-jhs-10.1177_17531934231212973.pdf]

**Table S3.** A) New outcomes added to round 2 Delphi.

| <b>Domain</b>                         | <b>New outcome proposed wording</b>                                                                          | <b>Hover wording<sup>1</sup></b>                                                                                                                     |
|---------------------------------------|--------------------------------------------------------------------------------------------------------------|------------------------------------------------------------------------------------------------------------------------------------------------------|
| <b>Physical signs</b>                 | Muscle fatigue or endurance                                                                                  | The ability of the muscle to sustain force over time                                                                                                 |
|                                       | Development of musculoskeletal problems in other parts of the body                                           | Development of other musculoskeletal problems in other parts of the body secondary to traumatic brachial plexus injury                               |
| <b>Emotional wellbeing</b>            | Expectations of treatment                                                                                    | To include expectations of benefit and side effects of treatments                                                                                    |
|                                       | Ability to cope                                                                                              | Coping strategies to include self-efficacy (an individual's belief and confidence that they can exert control over their life)                       |
| <b>Activities of daily living</b>     | Ability to eat using utensils or hand                                                                        | To include the manipulation of utensils (knife and fork, chopsticks, etc) or using their fingers to eat in a socially and culturally appropriate way |
| <b>Complications (muscle or bone)</b> | Limited voluntary movement because of the inability to co-ordinate muscles at the same time (co-contraction) | Co-contraction or poor muscle coordination leads to a lack of voluntary movement.                                                                    |

<sup>1</sup> When a participant **hovers** over an outcome in the Delphi, a more detailed explanation of the outcome appears in a text box by the outcome.

**Table S3.** B) Revised wording of seven outcomes from feedback in round 1 Delphi.

| <b>Domain</b>                        | <b>Existing outcome</b>                    | <b>Proposed wording for the outcome</b>                                    | <b>Proposed new wording for ‘hover’ function<sup>1</sup></b>                              | <b>Rationale</b>                                                                                                                                                                             |
|--------------------------------------|--------------------------------------------|----------------------------------------------------------------------------|-------------------------------------------------------------------------------------------|----------------------------------------------------------------------------------------------------------------------------------------------------------------------------------------------|
| <b>Physical signs</b>                | Strength of muscles in the arm             | No change<br>Strength of muscles in the arm                                | The ability of the muscle to generate enough force to work against gravity or resistance. | Several participants suggested that fatigue should be a separate outcome, so we removed it from the ‘strength’ outcome and made a new outcome                                                |
| <b>Sensation and pain in the arm</b> | Ability to feel with the arm               | Ability to feel with the arm including the hands and fingers               | No change<br>For example, the ability to feel touch, texture, shape, and weight           | Some participants commented and suggested the hand and fingers should be included as the sensation was more important in the hand than in the arm                                            |
| <b>Activities of Daily Living</b>    | Return to previous recreational activities | No change<br>Return to previous recreational activities                    | Including sports, gardening, and hobbies                                                  | Two participants suggested sports needed to be included                                                                                                                                      |
|                                      | Transport needs                            | Transport needs, including driving cars and riding motorbikes and bicycles | The ability to use transport including driving cars, riding motorbikes and bicycles       | A comment suggested that riding bicycles were particularly important in certain parts of the world where these injuries occur. It was decided to move ‘ride a bicycle’ into the main outcome |

<sup>1</sup> When a participant **hovers** over an outcome in the Delphi, a more detailed explanation of the outcome appears in a text box by the outcome.

| <b>Domain</b>              | <b>Existing outcome</b>            | <b>Proposed wording for the outcome</b>                                             | <b>Proposed new wording for hover<sup>1</sup> function</b>                        | <b>Rationale</b>                                                                                                                                                 |
|----------------------------|------------------------------------|-------------------------------------------------------------------------------------|-----------------------------------------------------------------------------------|------------------------------------------------------------------------------------------------------------------------------------------------------------------|
| <b>Emotional wellbeing</b> | Emotional distress                 | Emotional distress including anxiety, depression, post-traumatic stress             | To also include low mood, suicidal thoughts, flashbacks, and nightmares           | Many comments suggested that we should be measuring depression, anxiety and PTSD. These were always included in the hover, so we moved them to the outcome title |
|                            | Thoughts and beliefs               | Thoughts and beliefs                                                                | Including acceptance of injury                                                    | Remove expectations of treatment, as becoming a new outcome                                                                                                      |
|                            | Access to and quality of treatment | Access to (waiting times, distance from, ease of referral) and quality of treatment | Including distance to centres, waiting times, and information regarding treatment | Many comments that ease of access to specific centres was important and needed to be a main outcome, not only in explanation.                                    |

<sup>1</sup> When a participant **hovers** over an outcome in the Delphi, a more detailed explanation of the outcome appears in a text box by the outcome.
