# Supplementary material for: Development of a core outcome set for traumatic brachial plexus injury
Source: PubMed Central journal article supplement (PMC11044516; doi:10.1177/17531934231212973), 2023-11-21
Supplement: sj-pdf-4-jhs-10.1177_17531934231212973.pdf [file sj-pdf-4-jhs-10.1177_17531934231212973.pdf]

**Table S4.** Consensus meetings participants type by country.

| Country of participant | Patients | Clinicians | Total  |
|------------------------|----------|------------|--------|
|                        | n = 13   | n = 25     | n = 38 |
| United Kingdom         | 8        | 11         | 19     |
| Australia              | 2        | 2          | 4      |
| US                     | 1        | 2          | 3      |
| Canada                 | 1        | 1          | 2      |
| Sweden                 | 1        | 5          | 6      |
| Argentina              | 0        | 1          | 1      |
| South Africa           | 0        | 1          | 1      |
| Switzerland            | 0        | 1          | 1      |
| Denmark                | 0        | 1          | 1      |
